# Supplementary material for: Paternal early life stress exerts intergenerational effects on male C57Bl/6J offspring risk-taking behaviors and predator scent-induced c-Fos expression
Source: PubMed Central journal article supplement (PMC10154287; doi:10.1042/ns20220097), 2023-04-28
Supplement: NS-2022-0097_supp.pdf [file NS-2022-0097_supp.pdf]

## Supplementary Data 1

p-values for Figure 5 correlation matrix

|             | <b>Cg</b>     | <b>BNST</b>   | <b>MPOA</b> | <b>PVA</b>    | <b>BSTM</b> | <b>DG</b>     | <b>BLA</b> | <b>PVN</b>    |
|-------------|---------------|---------------|-------------|---------------|-------------|---------------|------------|---------------|
| <b>Cg</b>   |               | 0.070         | 0.275       | 0.125         | 0.092       | <i>0.001*</i> | 0.079      | <i>0.012*</i> |
| <b>BNST</b> | 0.070         |               | 0.068       | 0.498         | 0.073       | 0.165         | 0.514      | <i>0.018*</i> |
| <b>MPOA</b> | 0.275         | 0.068         |             | 0.377         | 0.119       | 0.711         | 0.641      | 0.705         |
| <b>PVA</b>  | 0.125         | 0.498         | 0.377       |               | 0.505       | <i>0.026</i>  | 0.273      | 0.295         |
| <b>BSTM</b> | 0.092         | 0.073         | 0.119       | 0.505         |             | 0.112         | 0.498      | 0.084         |
| <b>DG</b>   | <i>0.001*</i> | 0.165         | 0.711       | <i>0.026*</i> | 0.112       |               | 0.136      | <i>0.020*</i> |
| <b>BLA</b>  | 0.079         | 0.514         | 0.641       | 0.273         | 0.498       | 0.136         |            | 0.058         |
| <b>PVN</b>  | <i>0.012*</i> | <i>0.018*</i> | 0.705       | 0.295         | 0.084       | <i>0.020*</i> | 0.058      |               |
